# Supplementary material
Source: ML conference proceedings conference paper supplement (https://openreview.net/forum?id=IlQQU5Pp5p)
Supplement: supplementary_material [file attachment]

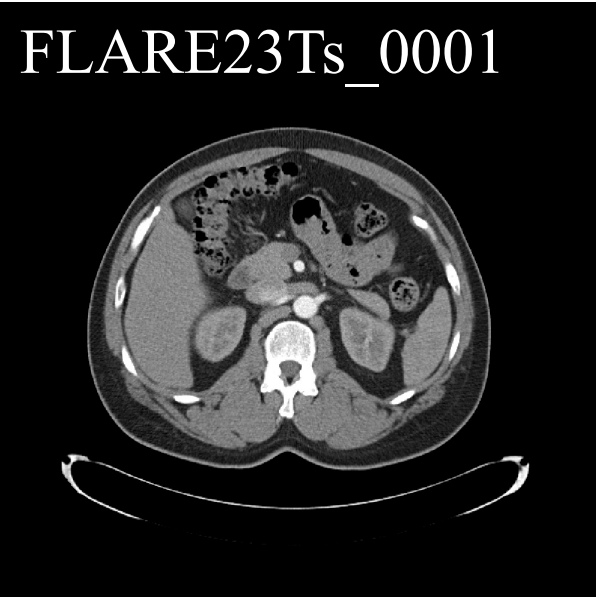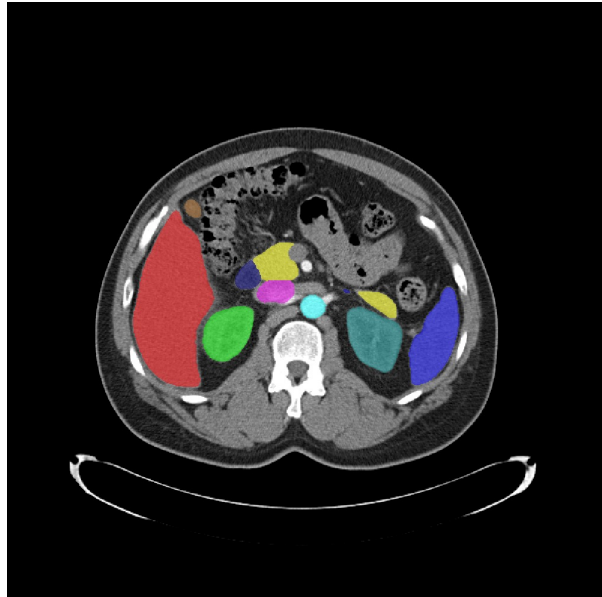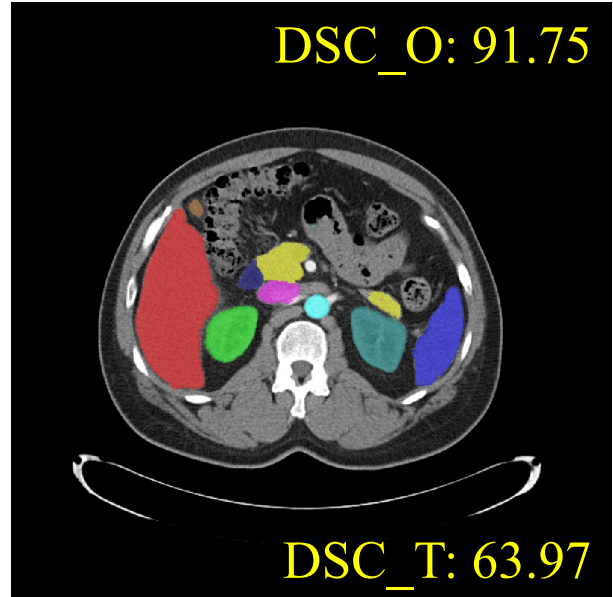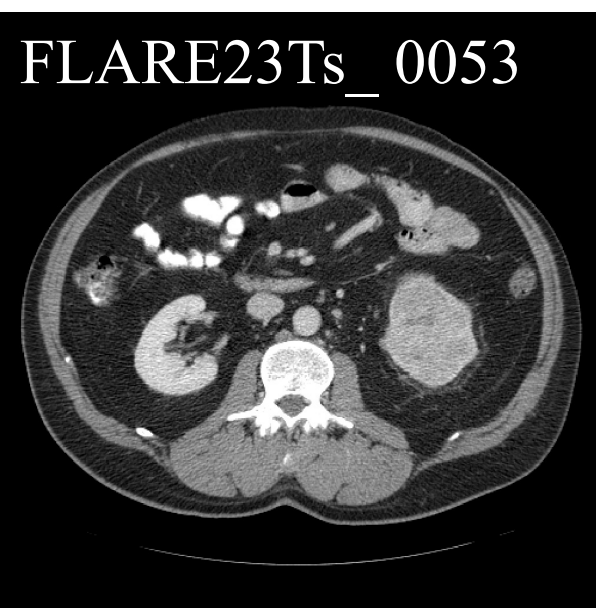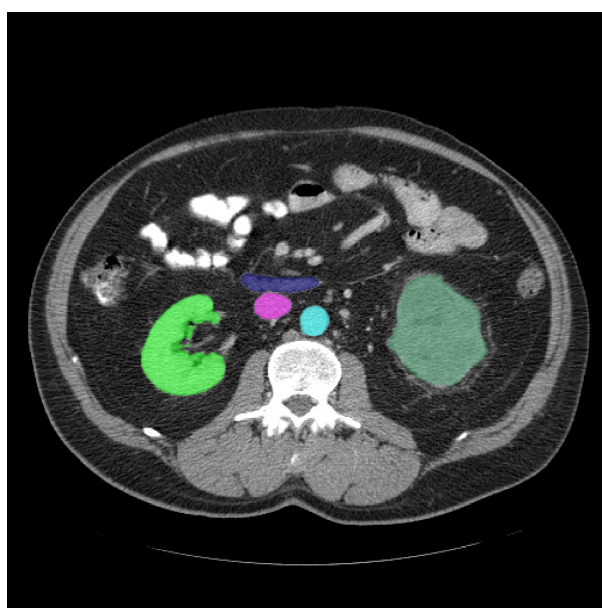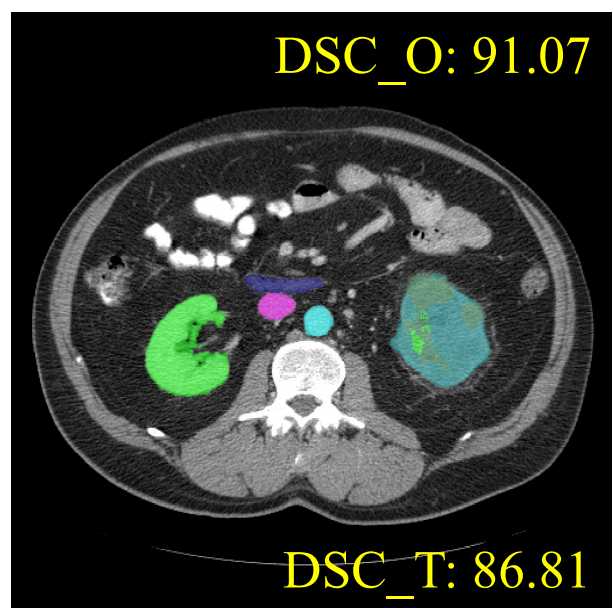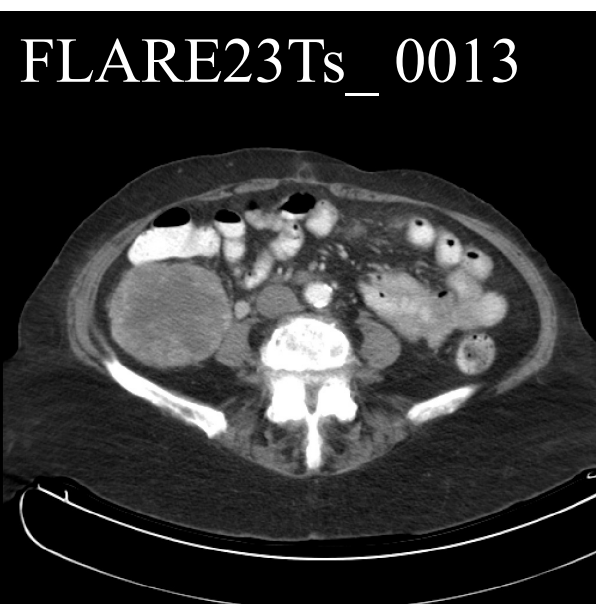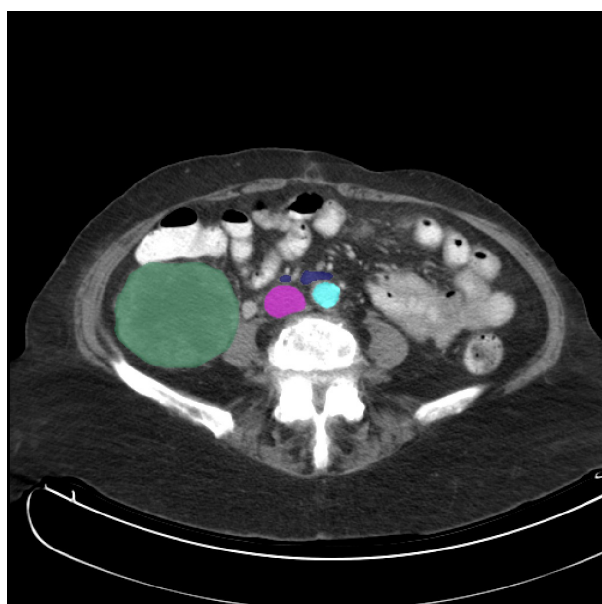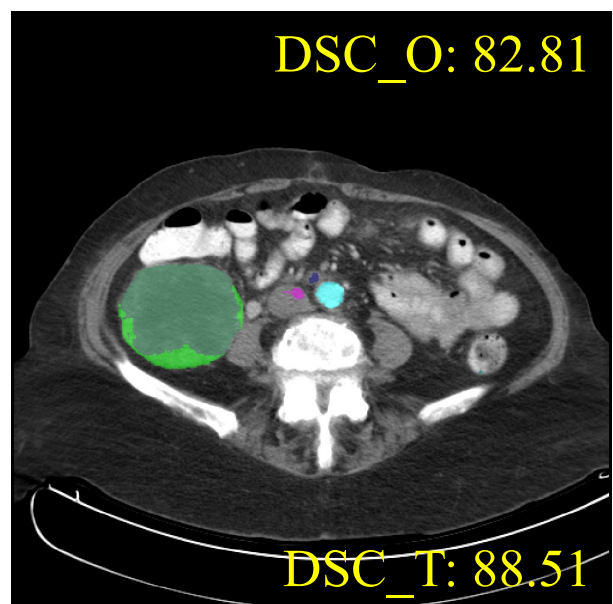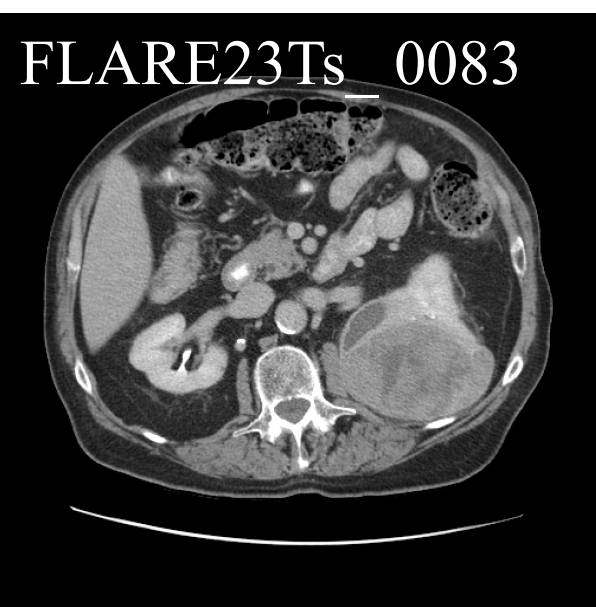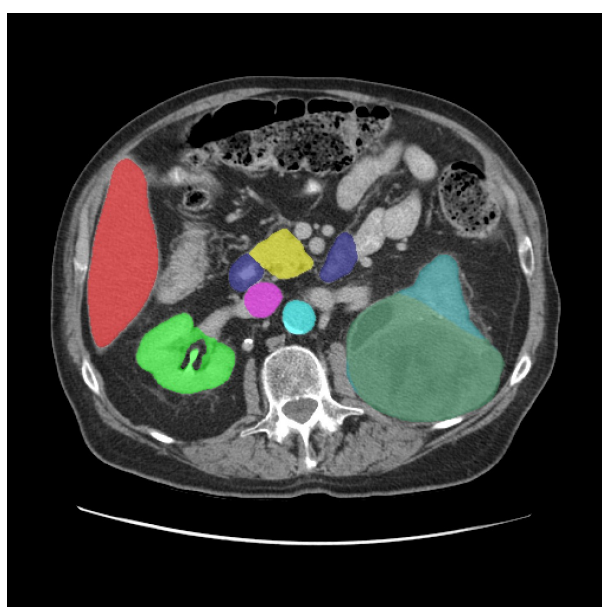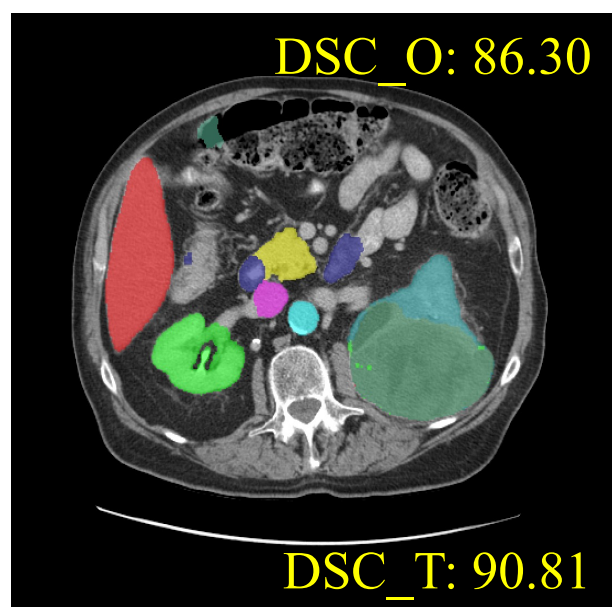

| Scan                                                                              |                 | Ground-Truth                                                                        |                       | Prediction                                                                           |                    |                                                                                       |                    |
|-----------------------------------------------------------------------------------|-----------------|-------------------------------------------------------------------------------------|-----------------------|--------------------------------------------------------------------------------------|--------------------|---------------------------------------------------------------------------------------|--------------------|
|  | Liver           |  | R-Kidney              |  | Spleen             |  | Pancreas           |
|  | Aorta           |  | Inferior Vena<br>Cava |  | R-Adrenal<br>Gland |  | L-Adrenal<br>Gland |
|  | Gall<br>bladder |  | Esophagus             |  | Stomach            |  | Duodenum           |
|  | Left<br>Kidney  |  | Tumor                 |                                                                                      |                    |                                                                                       |                    |
