# Supplementary material
Source: ML conference proceedings conference paper supplement (https://openreview.net/forum?id=IlQQU5Pp5p)

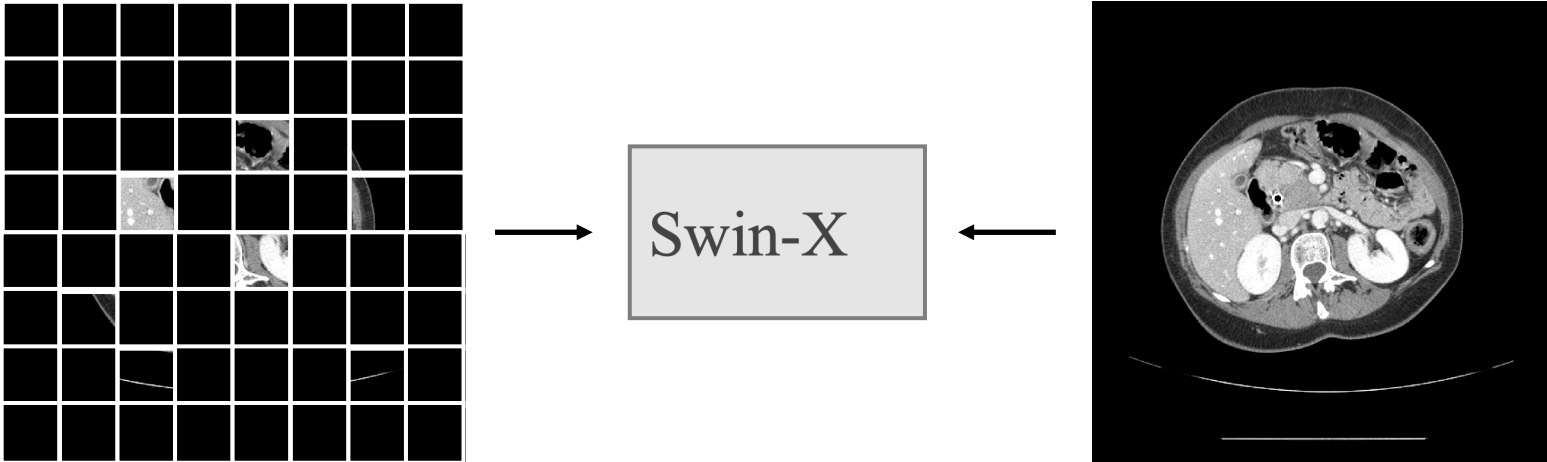

(a) Self-supervised Learning

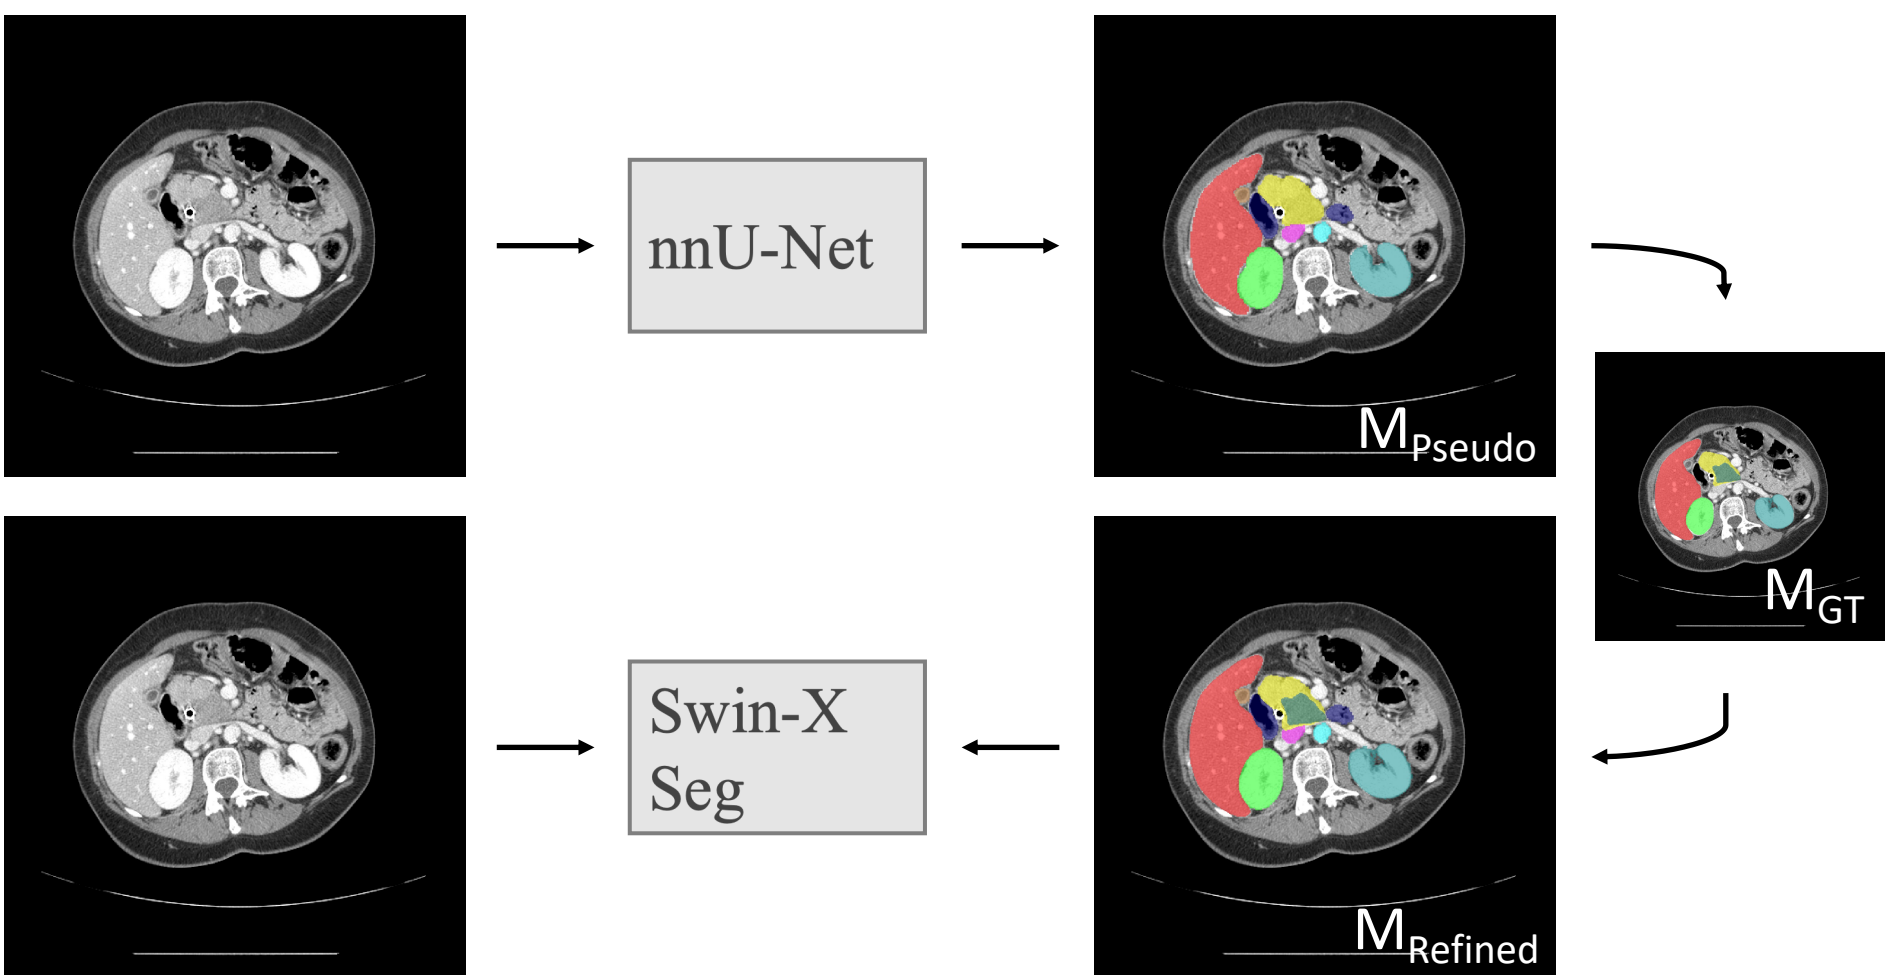

(b) Supervised Fine-tuning

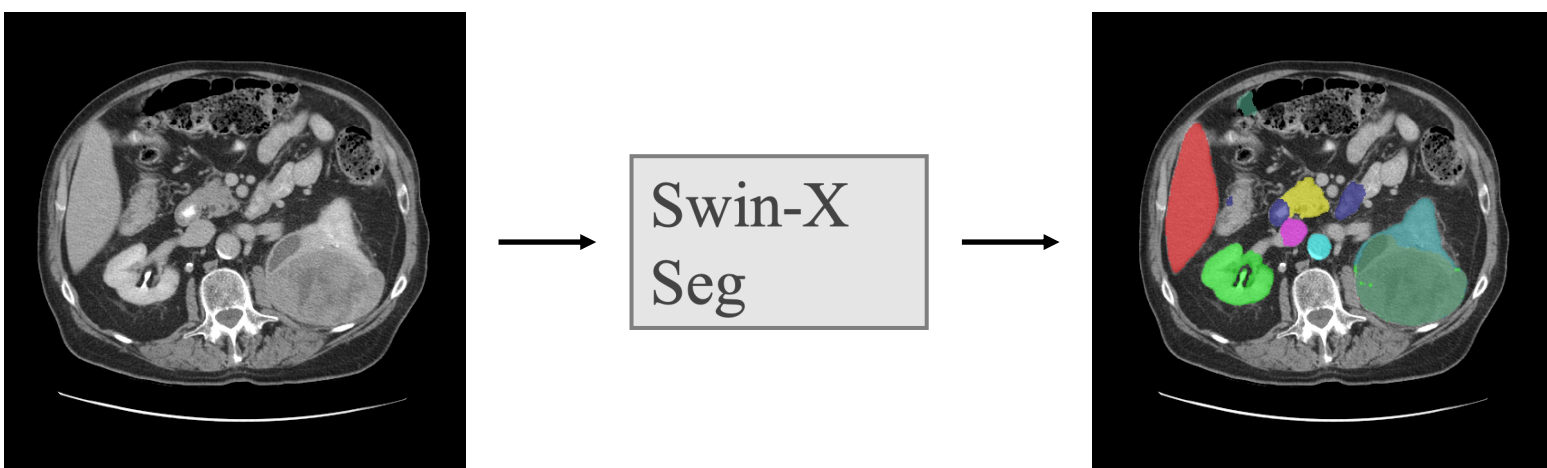

(c) Inference

Supplement: supplementary_material [file attachment]

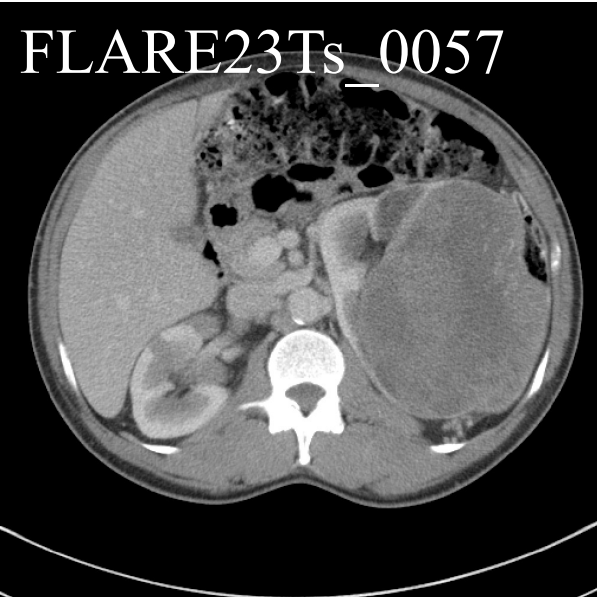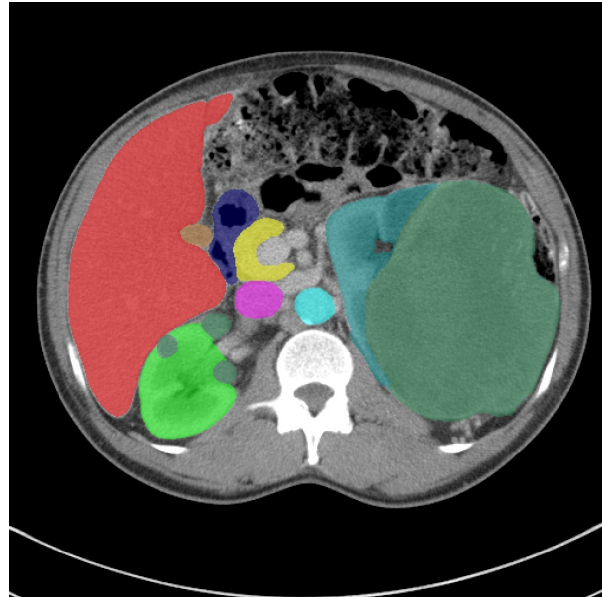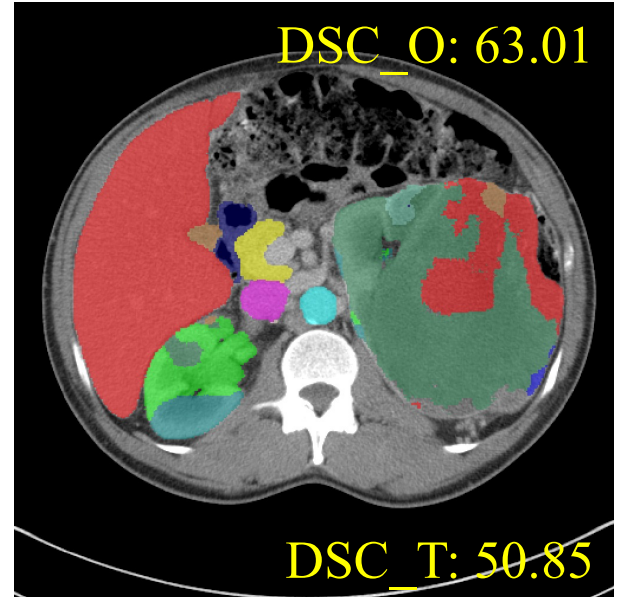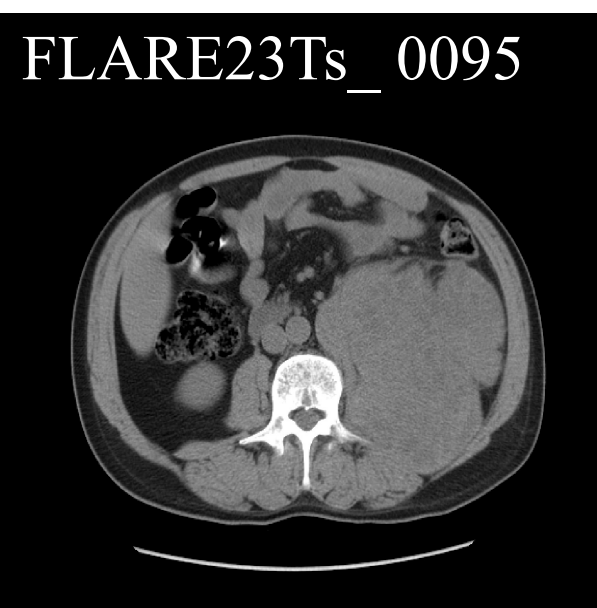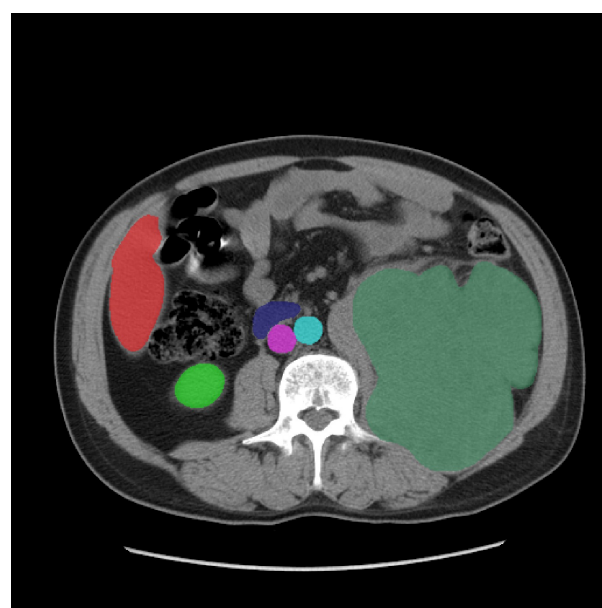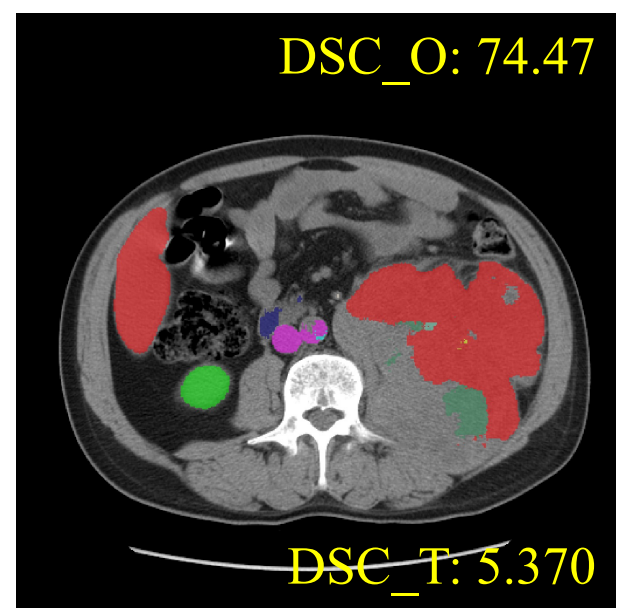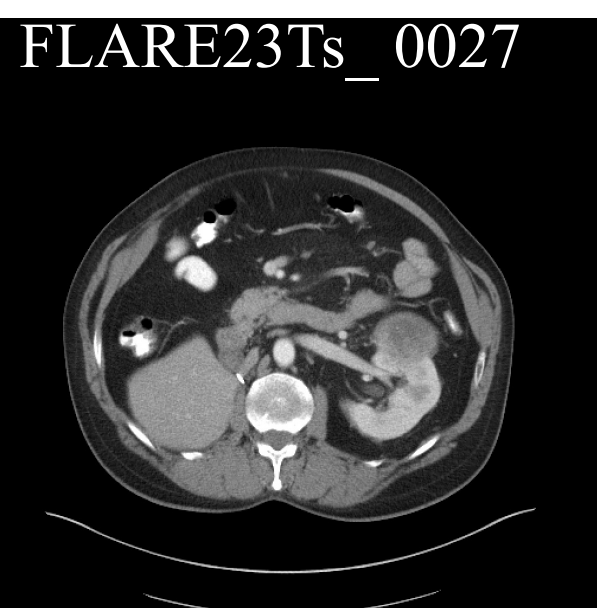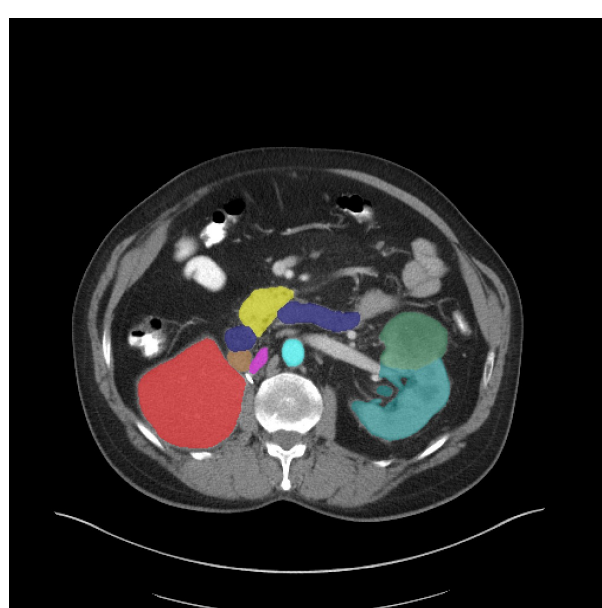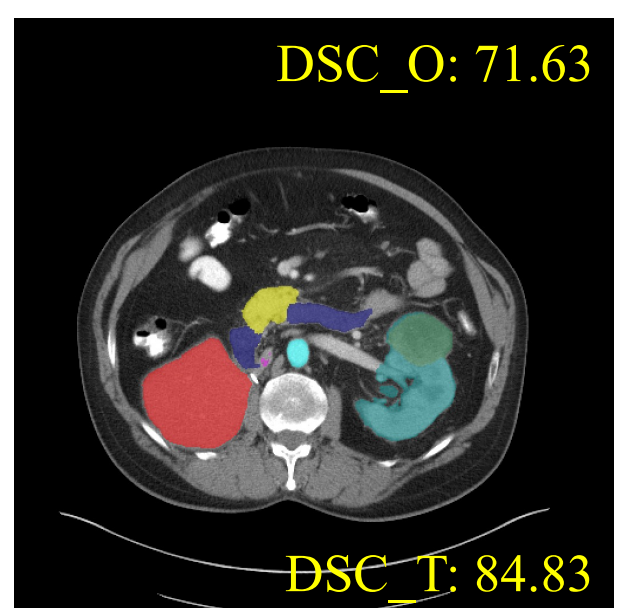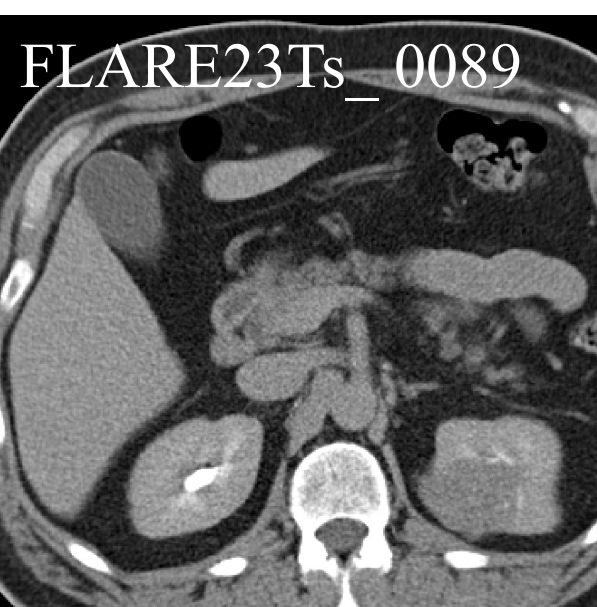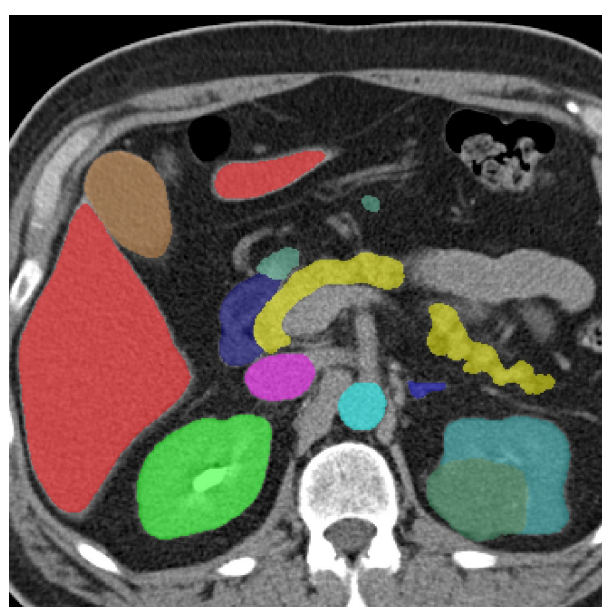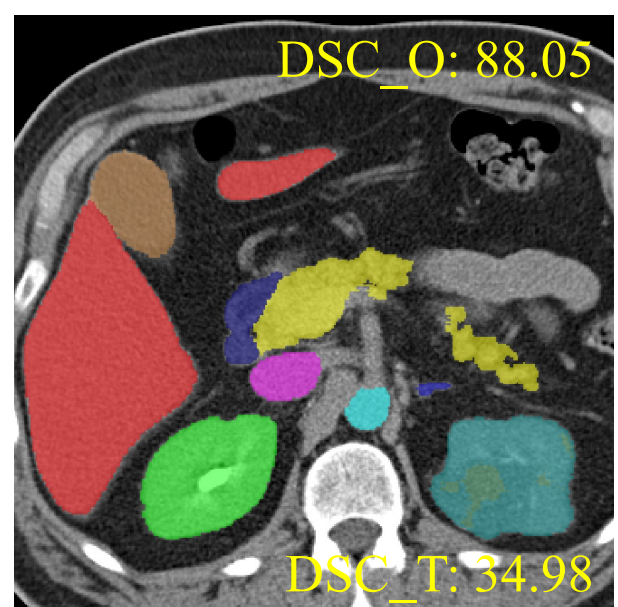

Scan Ground-Truth Prediction

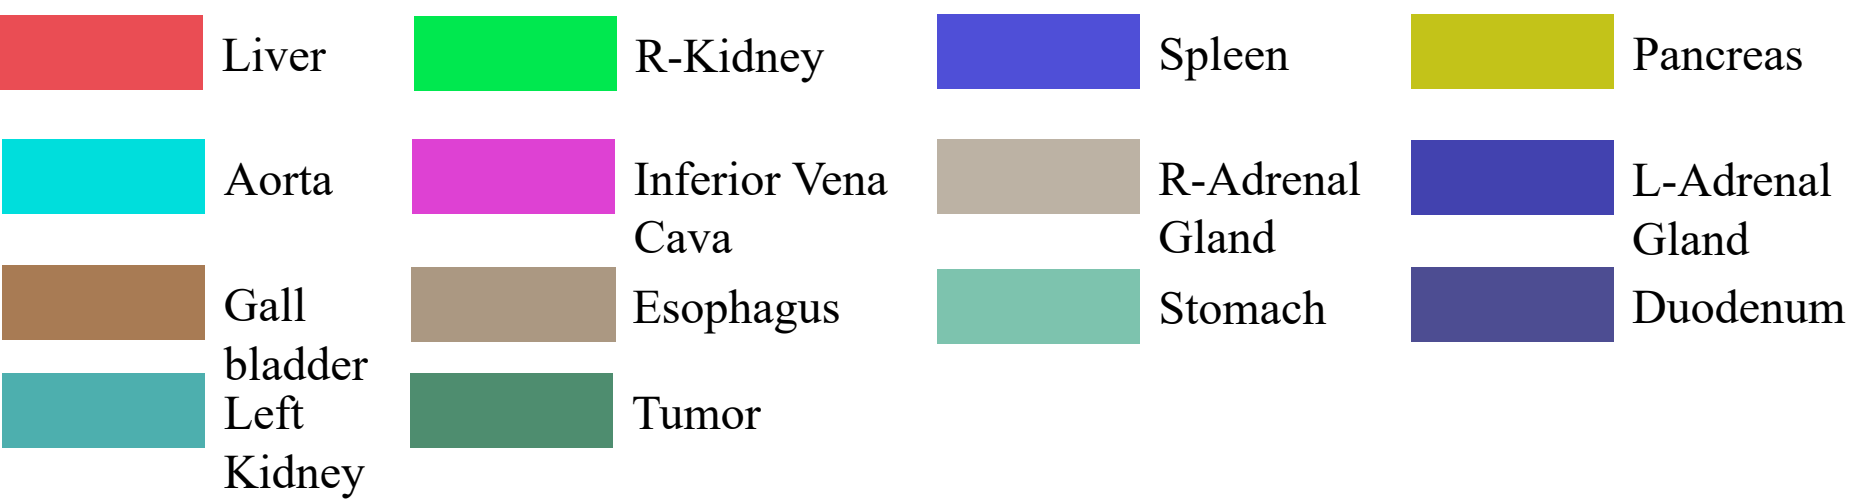

Supplement: supplementary_material [file attachment]
